# Supplementary material for: Assessment of a host–guest interaction in a bilayer membrane model
Source: Royal Society of Chemistry journal article supplement (doi:10.1039/d2ra03851j), 2022-01-01
Supplement: d2ra03851j1.pdf [file d2ra03851j1.pdf]

## Supporting Information

### Assessment of a Host-Guest Interaction in a Bilayer Membrane Model

Harshita Kumari,<sup>a,\*</sup> Saeedeh Negin,<sup>b</sup> Andrew Eisenhart,<sup>d</sup> Mohit B. Patel,<sup>b</sup> Thomas L. Beck,<sup>d,e</sup> Frank Heinrich,<sup>f,g</sup> Helena J. Spikes,<sup>b</sup> George W. Gokel<sup>b,c,\*</sup>

<sup>a</sup>James L. Winkle College of Pharmacy, University of Cincinnati, Cincinnati, Ohio, USA, 45267-0514. <sup>b</sup>Chemistry & Biochemistry and <sup>c</sup>Biology, University of Missouri–St. Louis, 1 University Blvd., St. Louis, MO 63121 U. S. A. <sup>d</sup>Department of Chemistry, University of Cincinnati, OH 45267 USA. <sup>e</sup>National Center for Computational Sciences, Oak Ridge National Laboratory, Oak Ridge, TN 37830. <sup>f</sup>Department of Physics, Carnegie Mellon University, Pittsburgh, PA 15213, USA. <sup>g</sup>NIST Center for Neutron Research, National Institute of Standards and Technology, Gaithersburg, MD 20899, USA.

## 1 NMR

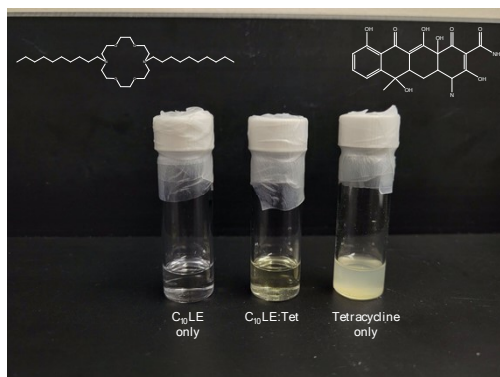

**Figure S1.** Vials containing C<sub>10</sub>LE, tetracycline and C<sub>10</sub>LE complexed with tetracycline.

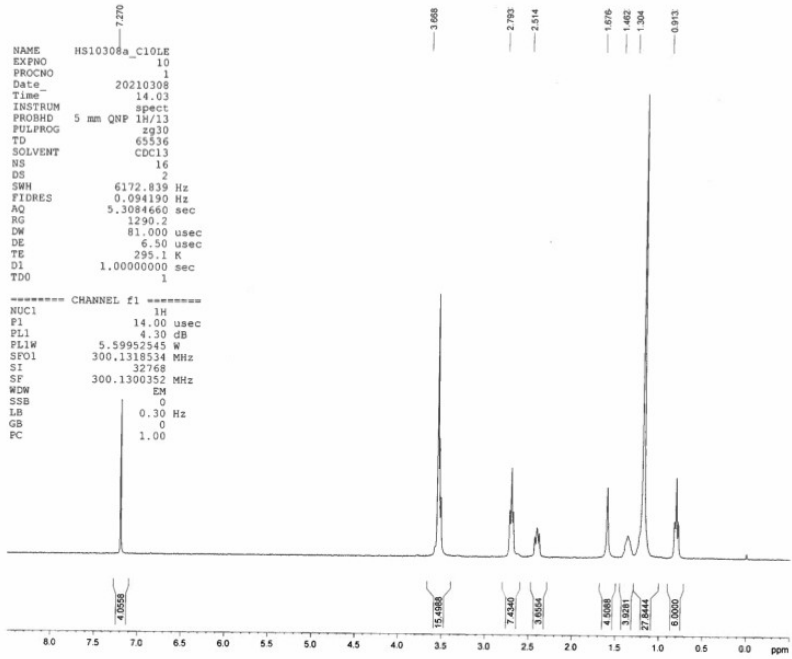

Figure S2. <sup>1</sup>H NMR spectrum of C<sub>10</sub>LE

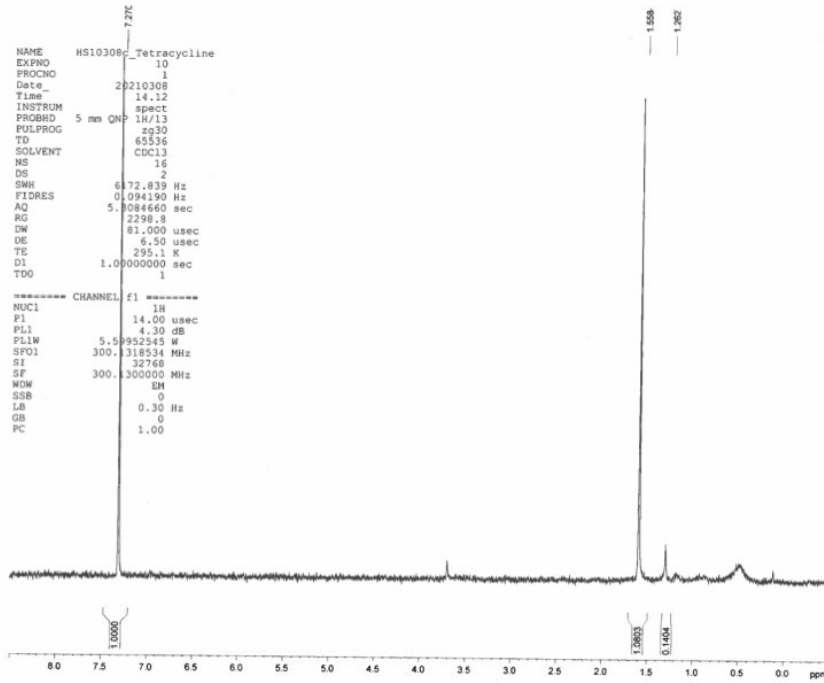

Figure S3. <sup>1</sup>H NMR spectrum of tetracycline hydrochloride

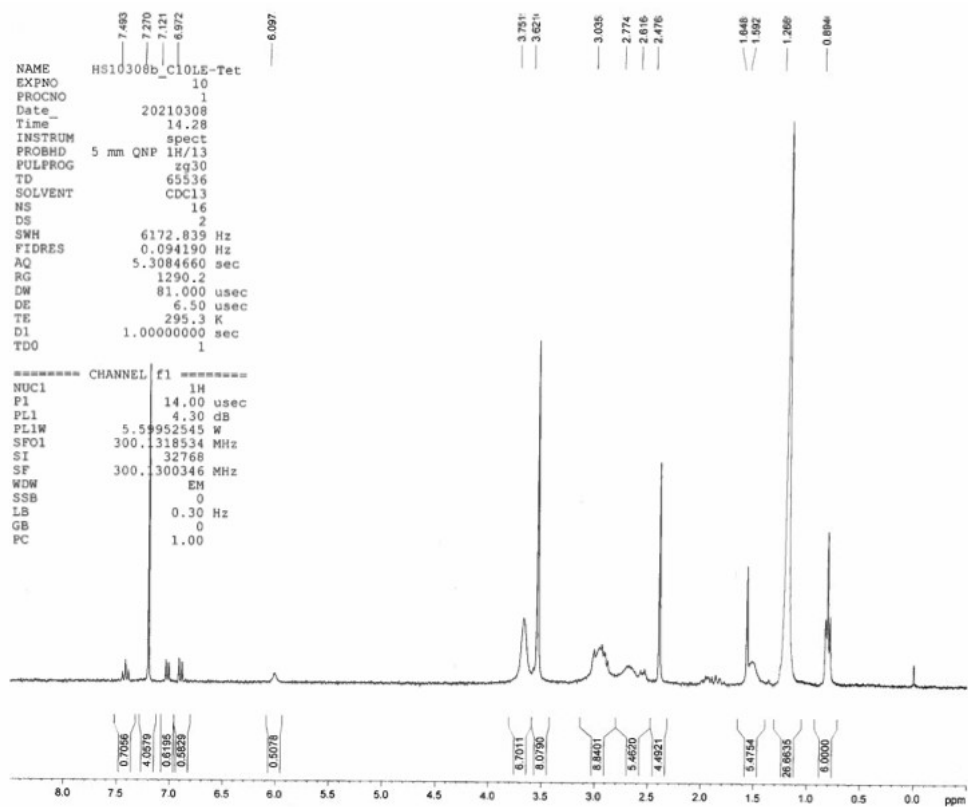

Figure S4.  $^1\text{H}$  NMR spectrum of  $\text{C}_{10}\text{LE}$  complexed with tetracycline hydrochloride

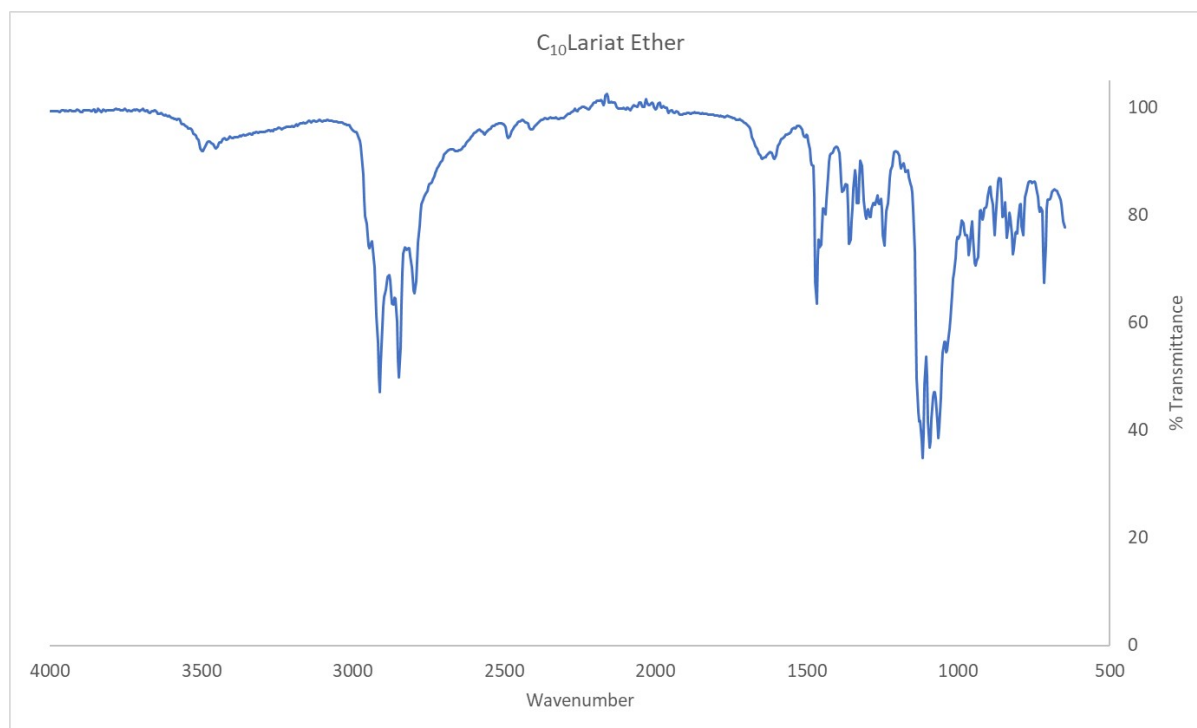

Figure S5. FT-IR spectrum of  $\text{C}_{10}\text{LE}$

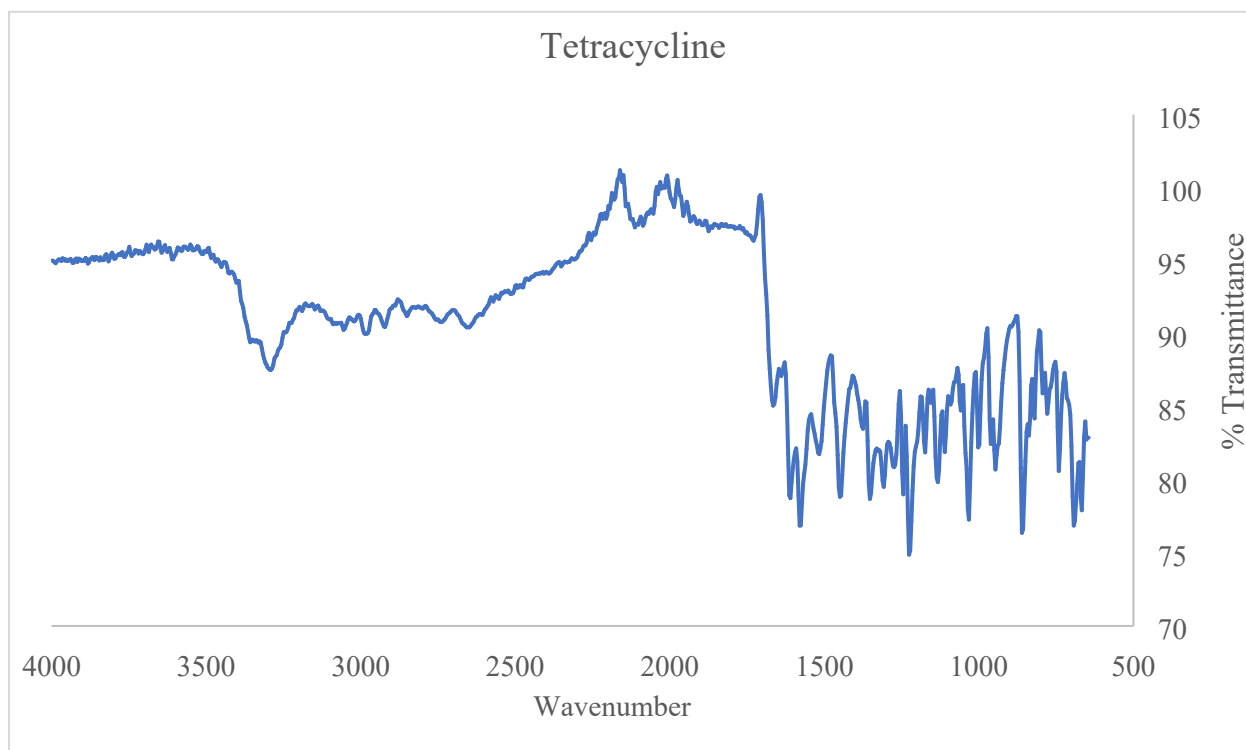

**Figure S6.** FT-IR spectrum of tetracycline hydrochloride.

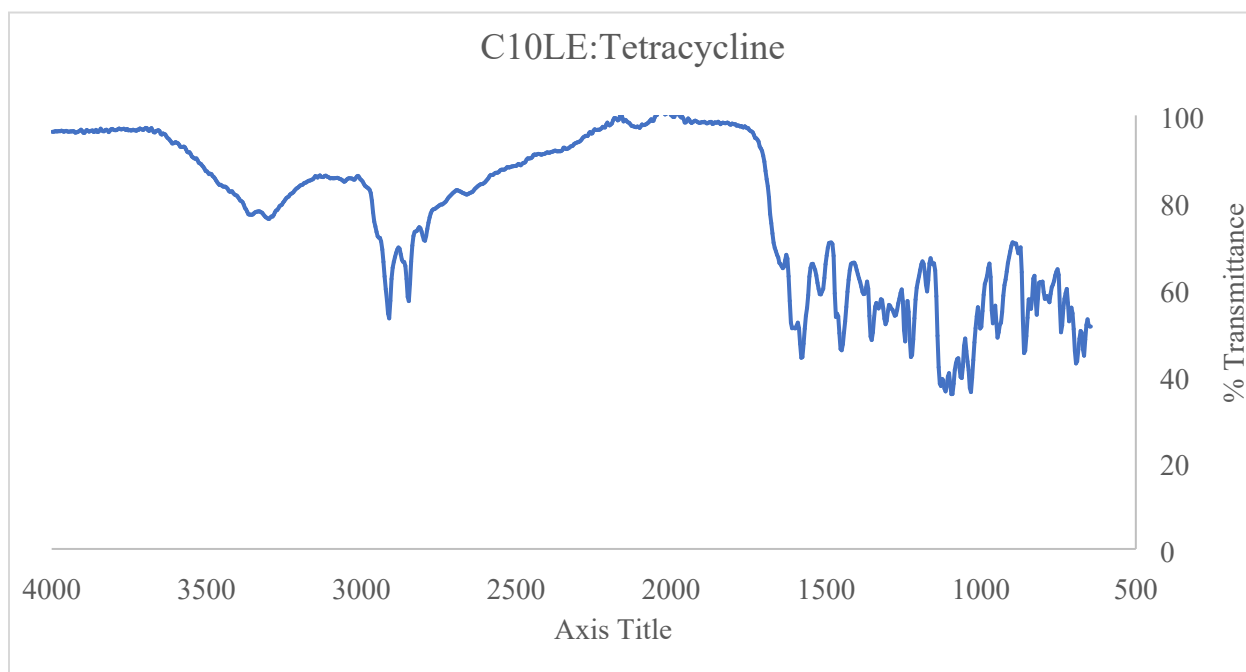

**Figure S7.** FT-IR spectrum of C<sub>10</sub>LE complexed with tetracycline hydrochloride.

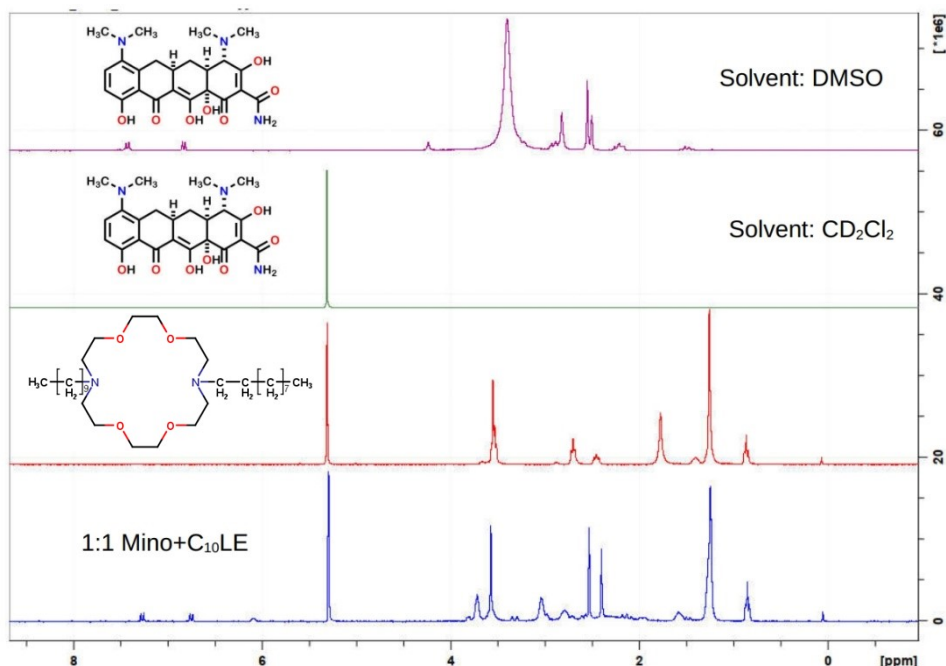

**Figure S8.** Stackplot  $^1\text{H}$  NMR spectrum of  $\text{C}_{10}\text{LE}$  complexed with minocycline.

Table S-1.  $^1\text{H}$ -NMR Spectra of *N,N*-Didecyl-4,13-diaza-18-crown-6 and Tetracycline Hydrochloride Recorded in  $\text{CDCl}_3$ .

| Compound                 | Chemical Shift and Multiplicity <sup>a</sup> |       |       |       |       |       |       |       |       |       |       |       |
|--------------------------|----------------------------------------------|-------|-------|-------|-------|-------|-------|-------|-------|-------|-------|-------|
| $\text{C}_{10}\text{LE}$ | —                                            | —     | —     | —     | —     | 3.7 q | —     | 2.8 t | 2.5 t | 1.5 s | 1.3 s | 0.9 t |
| TET                      | 7.6 t                                        | 7.1 d | 6.9 d | 5.1 s | —     | —     | —     | 2.7   | —     | —     | —     | —     |
| 1:1 Mixture              | 7.5 t                                        | 7.1 d | 6.9 d | 6.1 s | 3.8 s | 3.6 s | 3.0 m | 2.8 m | 2.5 s | 1.6 s | 1.3 s | 0.9 t |

Notes: d = doublet, m = multiplet, q = quartet, s = singlet, t = triplet.

The NMR spectrum of the solution containing both tetracycline and lariat ether shows significant distortions in the peaks corresponding to the crown protons, notably at 3.03 and 2.77 ppm. For this reason, all calculations relating to a complexation ratio were made using the aliphatic signal at 1.28, which corresponds to the internal aliphatic protons of the two sidearms. This signal was then compared with peaks which corresponded to the aromatic and dimethylamine protons found in tetracycline. The three aromatic protons appear between 6.9 and 7.5 ppm, while the dimethylamine protons appear at about 2.4 ppm. Each trial then averaged the complexation values obtained from the comparison of these signals with the aliphatic LE signal using the equation below. In summary, the NMR complexation experiment was replicated 5 times, although the average of  $1.00 \pm 0.03$  is ultimately the result of 20 individual calculations.

$$\frac{\text{Integral}_{\text{LE}}}{\text{Integral}_{\text{Tet}}} * \frac{\text{Proton}_{\text{Tet}}}{\text{Proton}_{\text{LE}}} = \text{Complexation Ratio}$$

Included is a sample calculation, which compares the dimethylamine signal of tetracycline with the aliphatic signal of LE.

$$\frac{27.3298}{5.8771} * \frac{6}{28} = 0.99675$$

## 2 NR DATA: C<sub>10</sub>LE / Tetracycline hydrochloride

### 2.1 Experimental

All experiments were carried out in pure water or heavy water. Solution of small molecules was aided by DMSO, where necessary.

**Table S1.** A table with the scattering length densities used in the fits

| Compound                                            | Formula                                                                      | Volume (Å <sup>3</sup> ) | Neutron scattering length (Å) | Neutron scattering length density (Å <sup>-2</sup> ) |
|-----------------------------------------------------|------------------------------------------------------------------------------|--------------------------|-------------------------------|------------------------------------------------------|
| tetracycline                                        | C <sub>22</sub> H <sub>24</sub> N <sub>2</sub> O <sub>8</sub>                | 470                      | 1.2E-03                       | 2.6E-06                                              |
| tetracycline, labile protons exchanged to deuterons | C <sub>22</sub> H <sub>18</sub> D <sub>6</sub> N <sub>2</sub> O <sub>8</sub> | 470                      | 1.8E-03                       | 3.9E-06                                              |
| C <sub>10</sub> LE                                  | C <sub>32</sub> H <sub>66</sub> N <sub>2</sub> O <sub>4</sub>                | 700                      | 7.8E-05                       | 0.1E-06                                              |
| C <sub>10</sub>                                     | C <sub>20</sub> H <sub>42</sub>                                              | 460                      | -2.5E-04                      | -0.5E-06                                             |
| LE                                                  | C <sub>12</sub> H <sub>24</sub> N <sub>2</sub> O <sub>4</sub>                | 240                      | 3.2E-04                       | 1.3E-06                                              |
| d <sub>31</sub> -POPC chains                        | C <sub>32</sub> H <sub>33</sub> D <sub>31</sub>                              | 925                      | 3.0E-03                       | 3.2E-06                                              |
| h-POPC chains                                       | C <sub>32</sub> H <sub>64</sub>                                              | 925                      | -2.72E-04                     | -0.3E-06                                             |
| POPC headgroup                                      | C <sub>10</sub> H <sub>18</sub> O <sub>8</sub> NP                            | 331                      | 6.0E-04                       | 1.8E-06                                              |

### 2.2 C<sub>10</sub>LE / tetracycline complex

**Table S2:** Median fit parameter values and 68% confidence limits for the simultaneous analysis of the C<sub>10</sub>LE / tetracycline hydrochloride experiments using a solid supported lipid bilayer composed of either d<sub>31</sub>-POPC or h<sub>31</sub>-POPC.

|                                                                    | 12 μM C <sub>10</sub> LE / 5 μM tetracycline incubation | 87 μM C <sub>10</sub> LE / 36 μM tetracycline incubation | Rinse                 |
|--------------------------------------------------------------------|---------------------------------------------------------|----------------------------------------------------------|-----------------------|
| <b>Substrate</b>                                                   |                                                         |                                                          |                       |
| Thickness silicon oxide h <sub>31</sub> /d <sub>31</sub> -POPC / Å | 8.8±0.4 / 8.0±0.9                                       | 8.7±0.6 / 8.2±0.7                                        | 9.0±0.6 / 7.9±0.6     |
| Substrate roughness, standard deviation σ / Å                      | 4.6±0.1 / 2.6±0.6                                       | 4.5±0.4 / 2.6±0.6                                        | 4.7±0.5 / 2.7±1.0     |
| <b>Bilayer</b>                                                     |                                                         |                                                          |                       |
| Thickness sub-membrane space / Å                                   | 1.0±0.4 / 1.8±0.8                                       | 1.3±0.5 / 1.6±0.7                                        | 1.5±0.5 / 1.2±0.7     |
| Hydrocarbon thickness inner lipid leaflet neat bilayer             | 16.3±0.6 / 15.7±1.2                                     | 15.5±0.5 / 14.9±0.7                                      | 15.5±0.5 / 14.9±0.7   |
| Hydrocarbon thickness outer lipid leaflet neat bilayer             | 12.9±0.5 / 13.6±1.0                                     | 13.3±0.5 / 13.8±0.7                                      | 12.9±0.5 / 13.4±0.6   |
| Thickness change per leaflet after adding avobenzonone             | -0.3±0.2 / -0.3±0.4                                     | -0.8±0.2 / -0.2±0.3                                      | -1.3±0.4 / -0.7±0.7   |
| Bilayer completeness neat bilayer                                  | 1.00±0.01 / 0.99±0.01                                   | 1.00±0.01 / 0.98±0.01                                    | 1.00±0.01 / 0.98±0.01 |
| Bilayer completeness after incubation                              | 1.00±0.01 / 0.99±0.01                                   | 1.00±0.01 / 1.00±0.01                                    | 1.00±0.01 / 1.00±0.01 |

| C <sub>10</sub> LE / tetracycline                                                                                          |                                                                 |                                                                 |                                                                 |
|----------------------------------------------------------------------------------------------------------------------------|-----------------------------------------------------------------|-----------------------------------------------------------------|-----------------------------------------------------------------|
| Peak position of C10LE distribution with respect to headgroup / bulk solvent interface / Å                                 | n/a                                                             | -33.7 ± 2.6                                                     | -32.8 ± 1.7                                                     |
| C <sub>10</sub> LE / tetracycline amount associated with bilayer (volume surface density) / Å <sup>3</sup> /Å <sup>2</sup> | total: 1.3 ± 0.6<br>C10LE: 0.7 ± 0.4<br>tetracycline: 0.4 ± 0.2 | total: 6.2 ± 0.8<br>C10LE: 5.0 ± 0.4<br>tetracycline: 1.3 ± 0.6 | total: 6.7 ± 1.3<br>C10LE: 5.4 ± 1.0<br>tetracycline: 1.2 ± 0.5 |

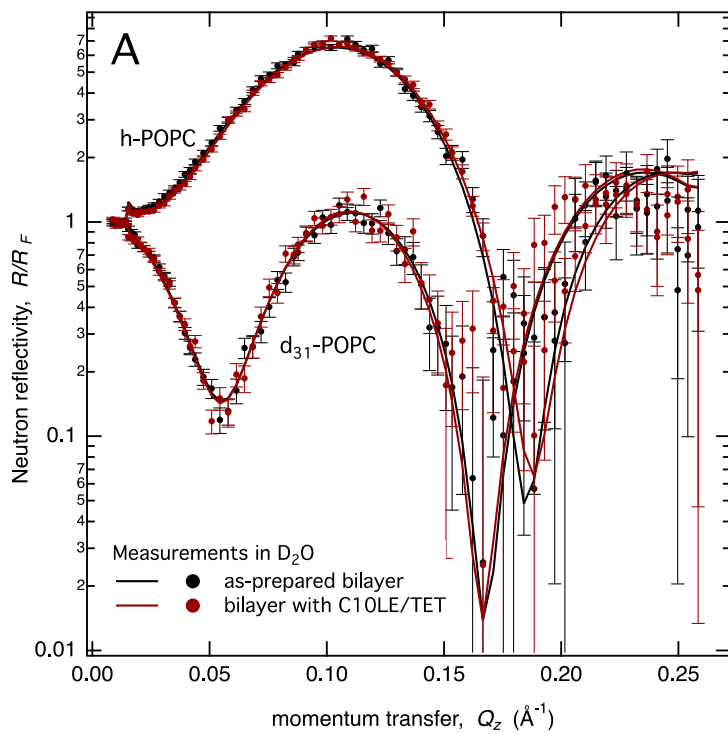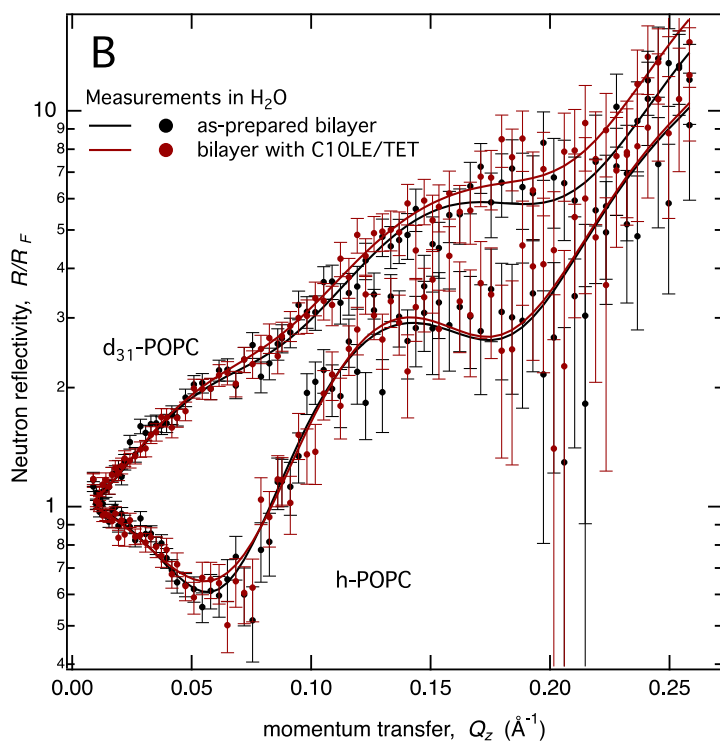

**Figure S9:** Fresnel normalized neutron reflectivity for the measurements of the as-prepared lipid bilayer and after adding of  $12 \mu\text{M}$   $C_{10}LE$  /  $5 \mu\text{M}$  tetracycline hydrochloride. Reflectivities for the  $h_{31}$ -POPC and  $d_{31}$ -POPC lipid bilayers are shown.



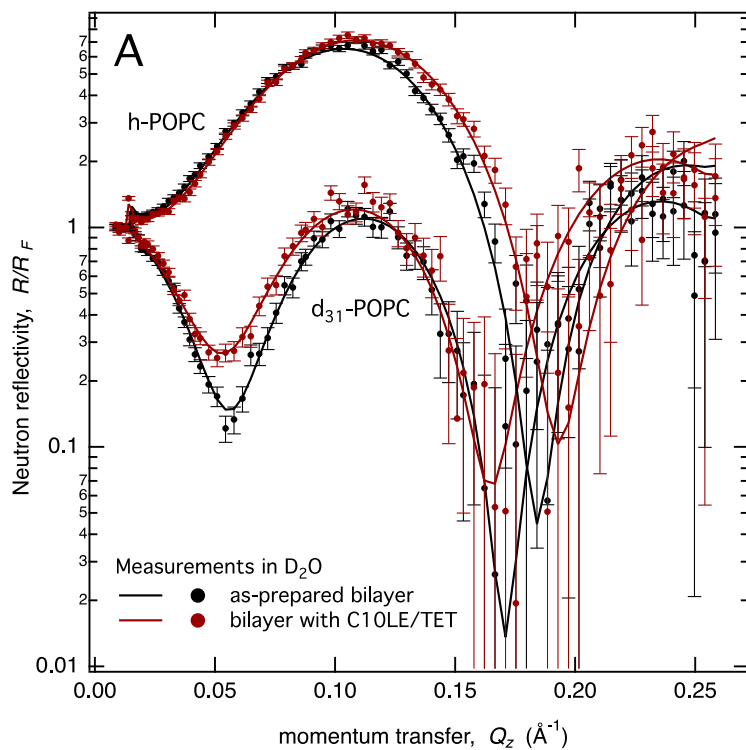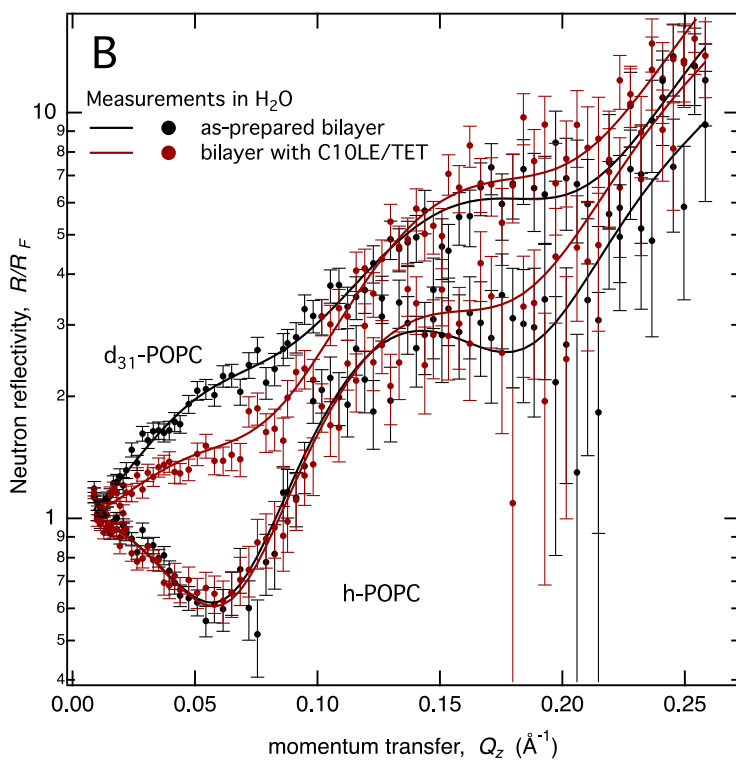

**Figure S10:** Fresnel normalized neutron reflectivity for the measurements of the as-prepared lipid bilayer and after adding of  $87 \mu\text{M}$  C<sub>10</sub>LE /  $36 \mu\text{M}$  tetracycline hydrochloride. Reflectivities for the h<sub>31</sub>-POPC and d<sub>31</sub>-POPC lipid bilayers are shown.

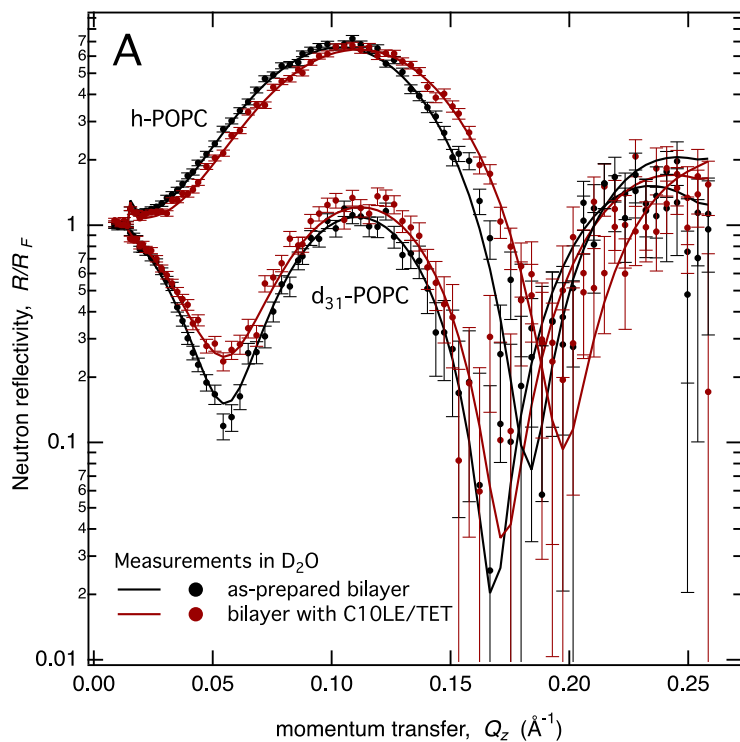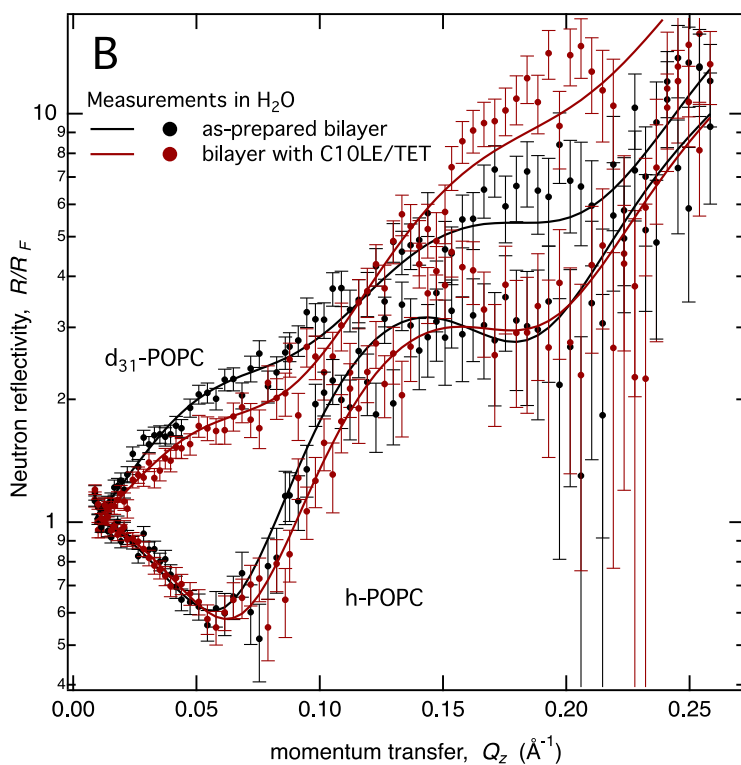

**Figure S11:** Fresnel normalized neutron reflectivity for the measurements of the as-prepared lipid bilayer and after a final rinse with pure water. Reflectivities for the  $h_{31}$ -POPC and  $d_{31}$ -POPC lipid bilayers are shown.

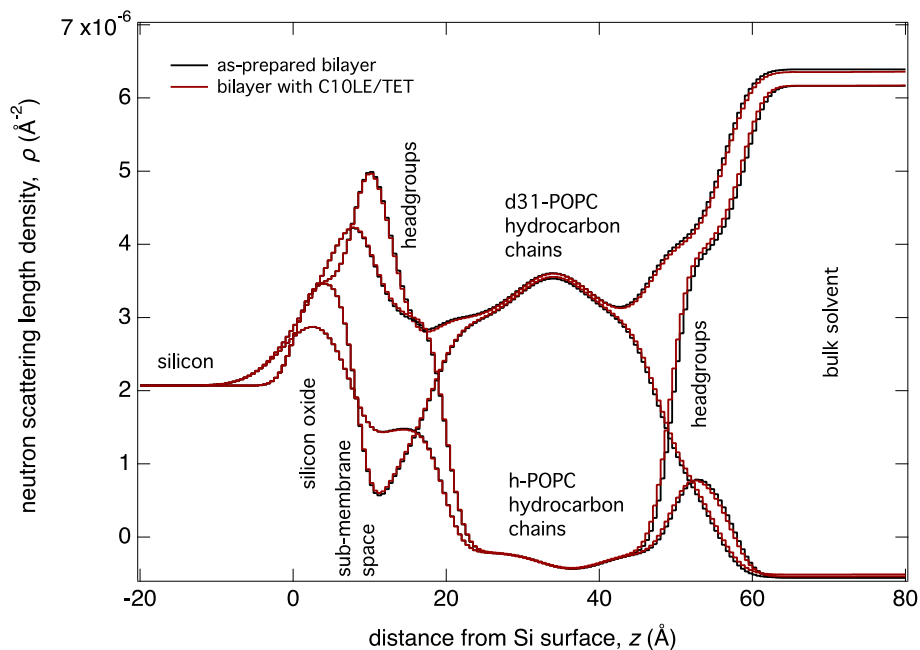

**Figure S12:** Best-fit nSLD profiles for the measurements of the as-prepared d<sub>31</sub>-POPC and h<sub>31</sub>-POPC lipid bilayers and after adding 12 μM C<sub>10</sub>LE / 5 μM TET.

C<sub>10</sub>LE/tetracycline hydrochloride 87μM/36 μM

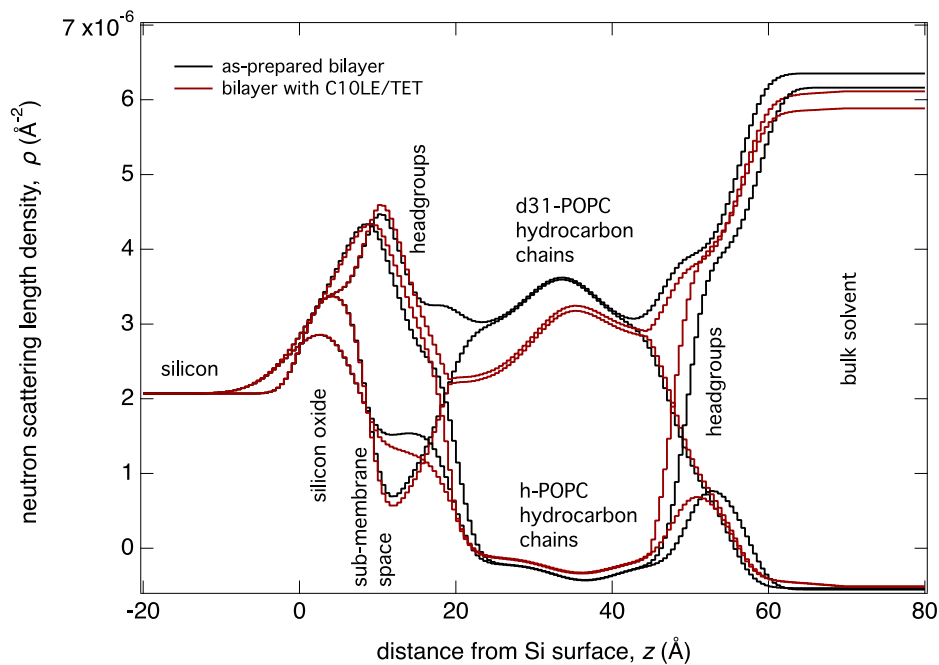

**Figure S13:** Best-fit nSLD profiles for the measurements of the as-prepared d<sub>31</sub>-POPC and h<sub>31</sub>-POPC lipid bilayers and after adding 87 μM C<sub>10</sub>LE / 36 μM TET.

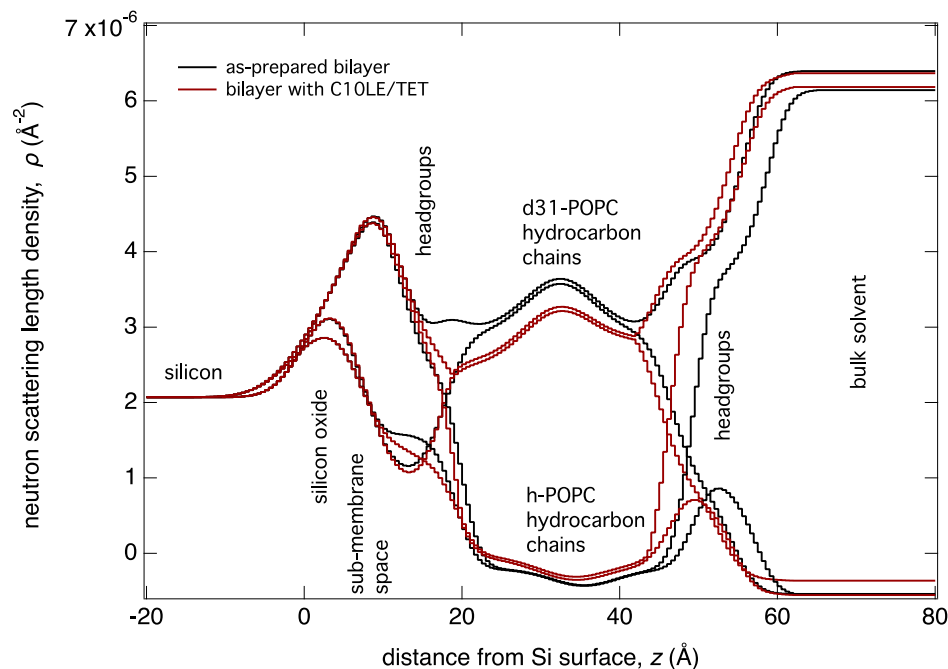

**Figure S14:** Best-fit nSLD profiles for the measurements of the as-prepared  $d_{31}$ -POPC and  $h_{31}$ -POPC lipid bilayers and after a final rinse with pure water.

### 2.3 C10LE

Table S3: Median fit parameter values and 68% confidence limits for the analysis of the C10LE experiments.

|                                                                                             | 12 $\mu$ M C10LE                | 58 $\mu$ M C10LE                | Rinse                           |
|---------------------------------------------------------------------------------------------|---------------------------------|---------------------------------|---------------------------------|
| <b>Substrate</b>                                                                            |                                 |                                 |                                 |
| Thickness silicon oxide $h_{31}/d_{31}$ -POPC / $\text{\AA}$                                | $8.0 \pm 0.8 / 8.2 \pm 0.6$     | $7.2 \pm 0.6 / 9.7 \pm 0.5$     | $7.6 \pm 0.7 / 8.2 \pm 0.5$     |
| Substrate roughness, standard deviation $\sigma$ / $\text{\AA}$                             | $4.3 \pm 0.4 / 3.6 \pm 0.7$     | $0.8 \pm 0.4 / 2.0 \pm 0.4$     | $4.4 \pm 0.4 / 4.6 \pm 0.4$     |
| <b>Bilayer</b>                                                                              |                                 |                                 |                                 |
| Thickness sub-membrane space / $\text{\AA}$                                                 | $1.9 \pm 0.9 / 3.9 \pm 0.6$     | $1.9 \pm 0.6 / 3.0 \pm 0.6$     | $1.7 \pm 0.6 / 3.0 \pm 0.7$     |
| Hydrocarbon thickness inner lipid leaflet                                                   | $16 \pm 1 / 19 \pm 1$           | $14 \pm 1 / 12 \pm 1$           | $14 \pm 1 / 10 \pm 1$           |
| Hydrocarbon thickness outer lipid leaflet                                                   | $13 \pm 1 / 10 \pm 1$           | $12 \pm 1 / 13 \pm 1$           | $11 \pm 1 / 14 \pm 1$           |
| Thickness change per leaflet after incubation                                               | $-0.1 \pm 0.2 / +0.2 \pm 0.2$   | $-1.5 \pm 0.2 / -1.9 \pm 0.3$   | $-1.9 \pm 0.2 / -2.3 \pm 0.3$   |
| Bilayer completeness neat bilayer                                                           | $0.98 \pm 0.01 / 0.98 \pm 0.01$ | $0.96 \pm 0.01 / 0.94 \pm 0.01$ | $0.96 \pm 0.01 / 0.97 \pm 0.02$ |
| Bilayer completeness after adding C10LE                                                     | $0.99 \pm 0.01 / 0.96 \pm 0.01$ | $1.00 \pm 0.01 / 0.99 \pm 0.01$ | $0.99 \pm 0.01 / 0.98 \pm 0.01$ |
| Area per lipid outer leaflet with C10LE / $\text{\AA}^2$                                    | $90 \pm 7 / 70 \pm 5$           | $75 \pm 7 / 70 \pm 5$           | $80 \pm 5 / 65 \pm 5$           |
| <b>C10LE</b>                                                                                |                                 |                                 |                                 |
| C10LE amount associated with bilayer (volume surface density) / $\text{\AA}^3/\text{\AA}^2$ | $3.0 \pm 0.4$                   | $7.4 \pm 0.4$                   | $4.5 \pm 0.7$                   |

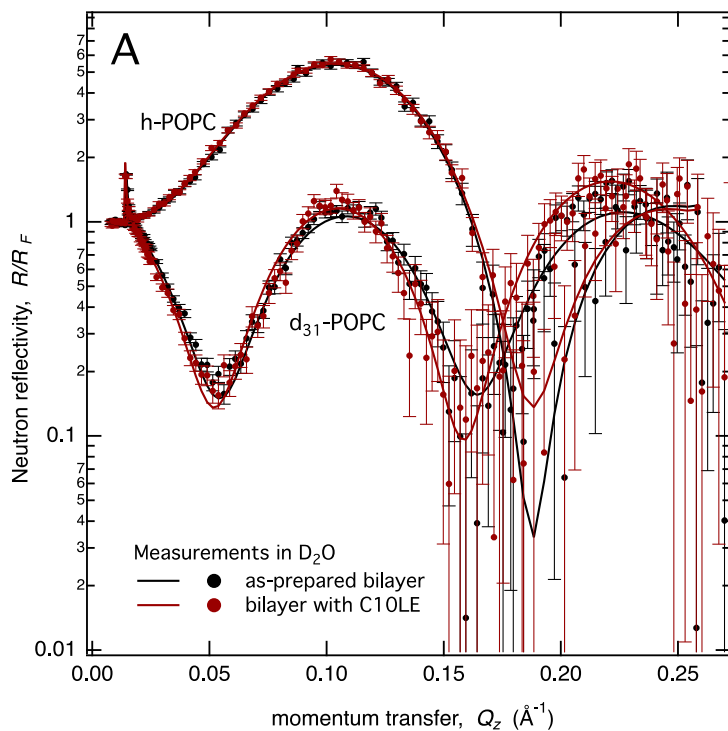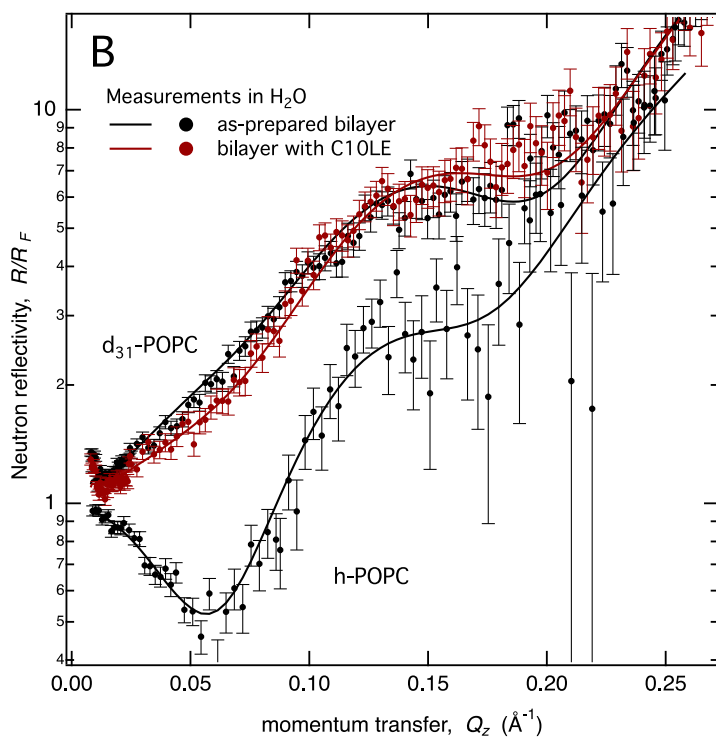

**Figure S15:** Fresnel normalized neutron reflectivity for the measurements of the as-prepared lipid bilayer and after adding of 12  $\mu\text{M}$  C<sub>10</sub>LE. Reflectivities for the h<sub>31</sub>-POPC and d<sub>31</sub>-POPC lipid bilayers are shown.

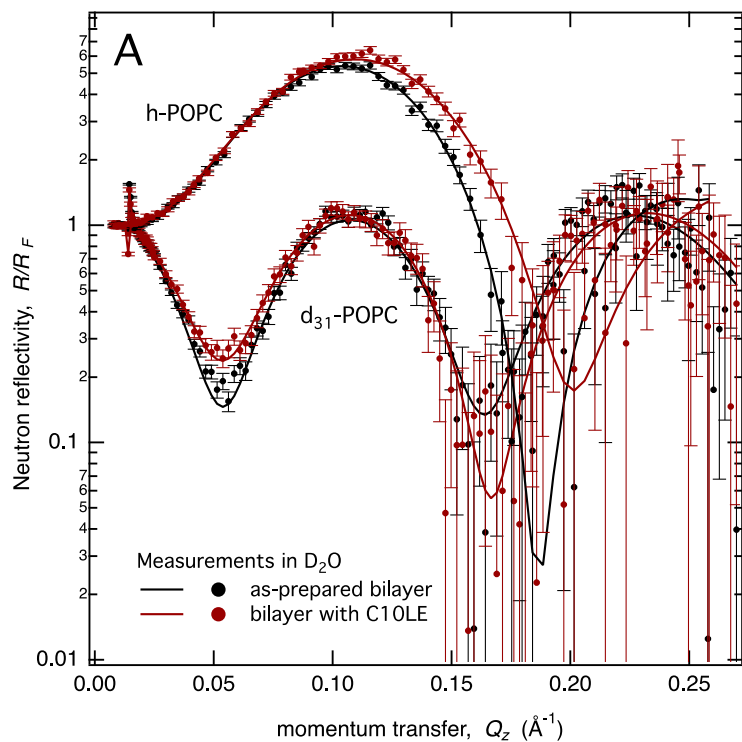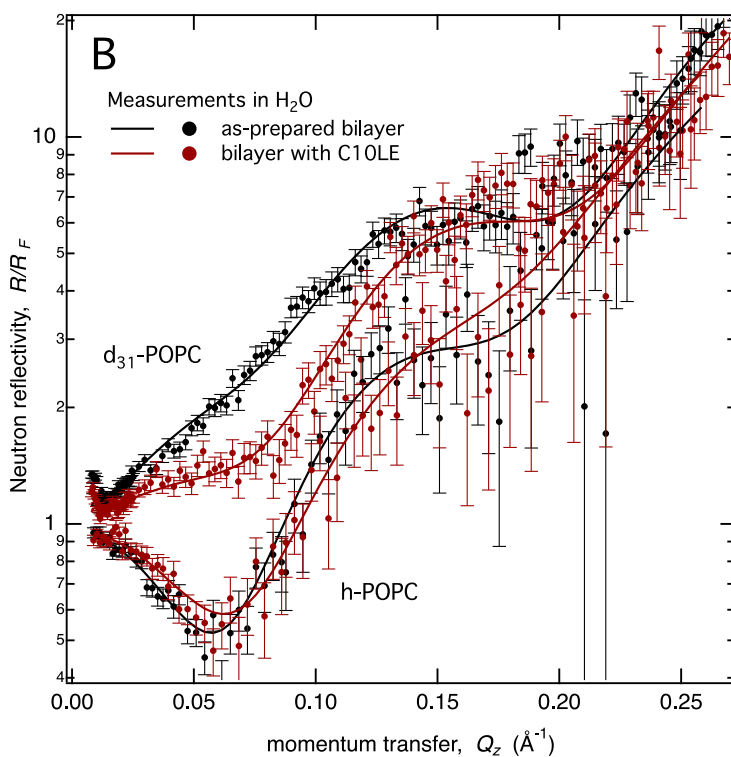

Figure S16: Fresnel normalized neutron reflectivity for the measurements of the as-prepared lipid bilayer and after adding of  $58\mu\text{M}$  C10LE. Reflectivities for the h31-POPC and d31-POPC lipid bilayers are shown.

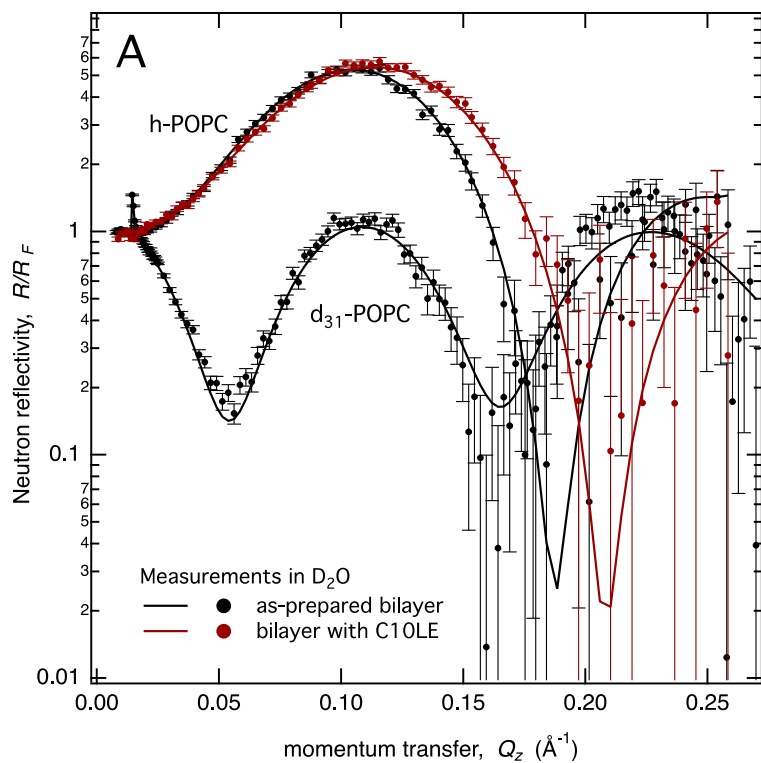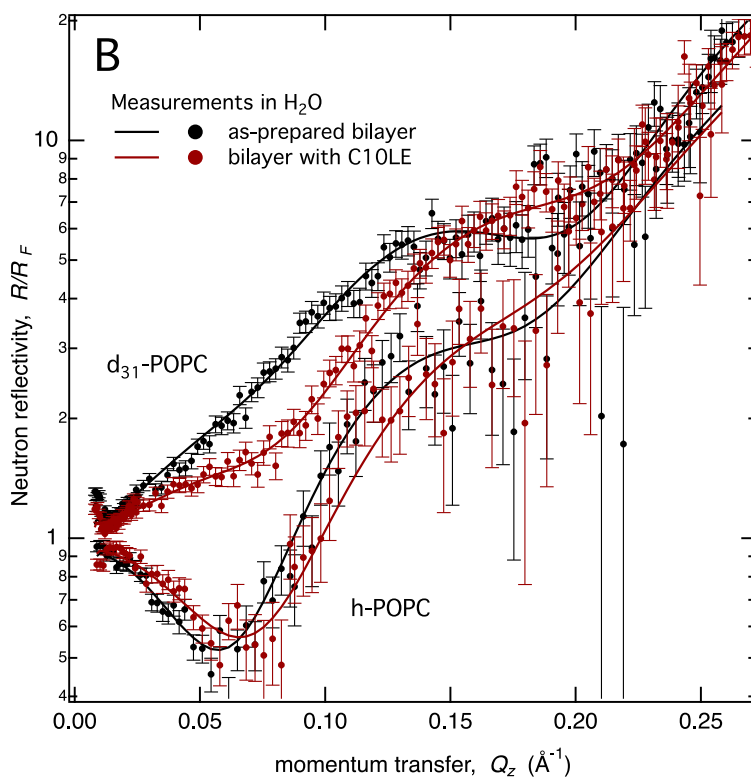

Figure S17: Fresnel normalized neutron reflectivity for the measurements of the as-prepared lipid bilayer and after a final rinse with pure water. Reflectivities for the h31-POPC and d31-POPC lipid bilayers are shown.

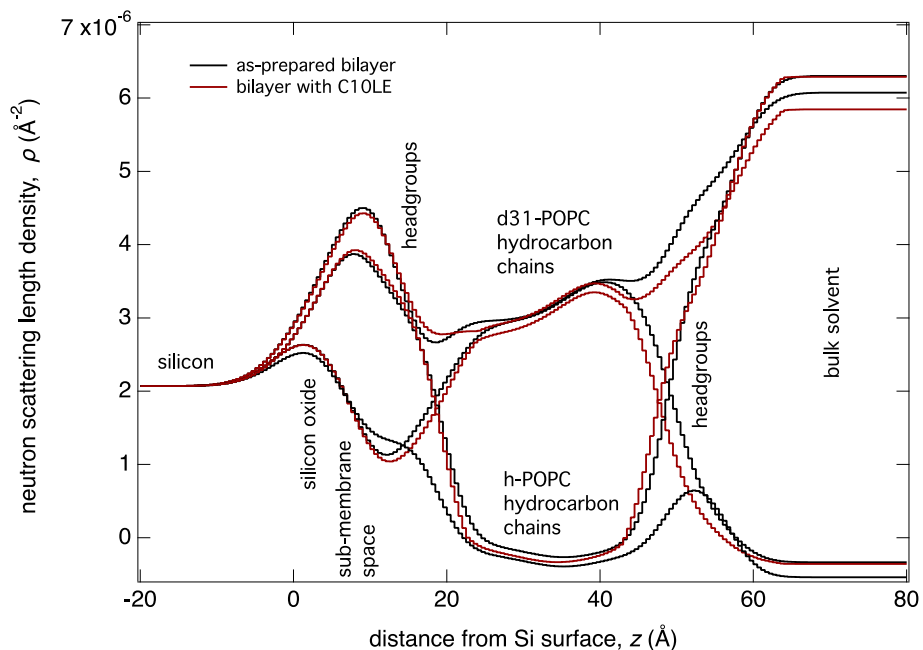

Figure S18: Best-fit nSLD profiles for the measurements of the as-prepared  $d_{31}$ -POPC and  $h_{31}$ -POPC lipid bilayers and after adding  $12 \mu\text{M}$  C10LE.

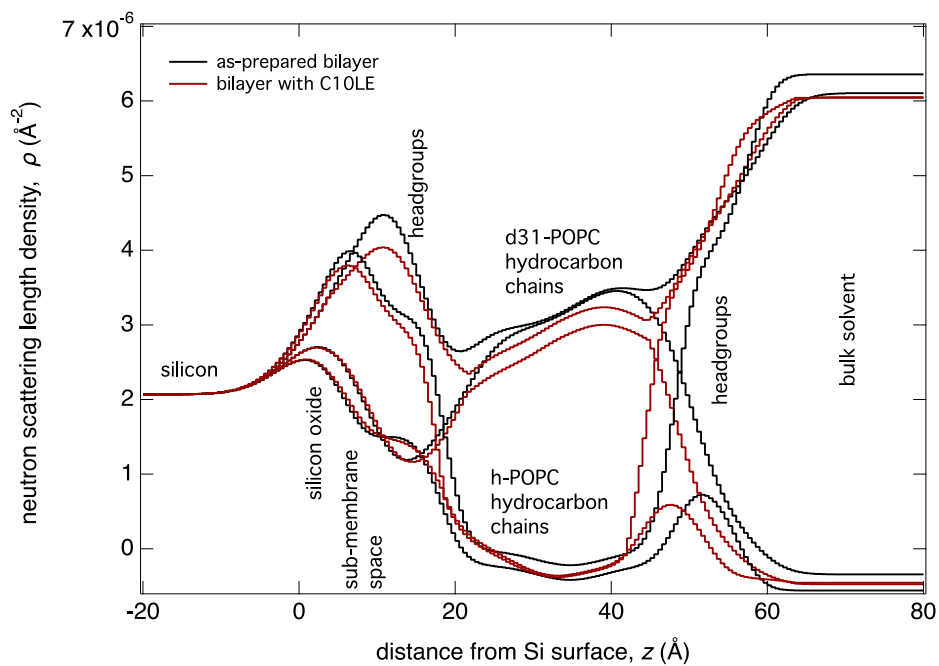

Figure S19: Best-fit nSLD profiles for the measurements of the as-prepared  $d_{31}$ -POPC and  $h_{31}$ -POPC lipid bilayers and after adding  $58 \mu\text{M}$  C10LE.



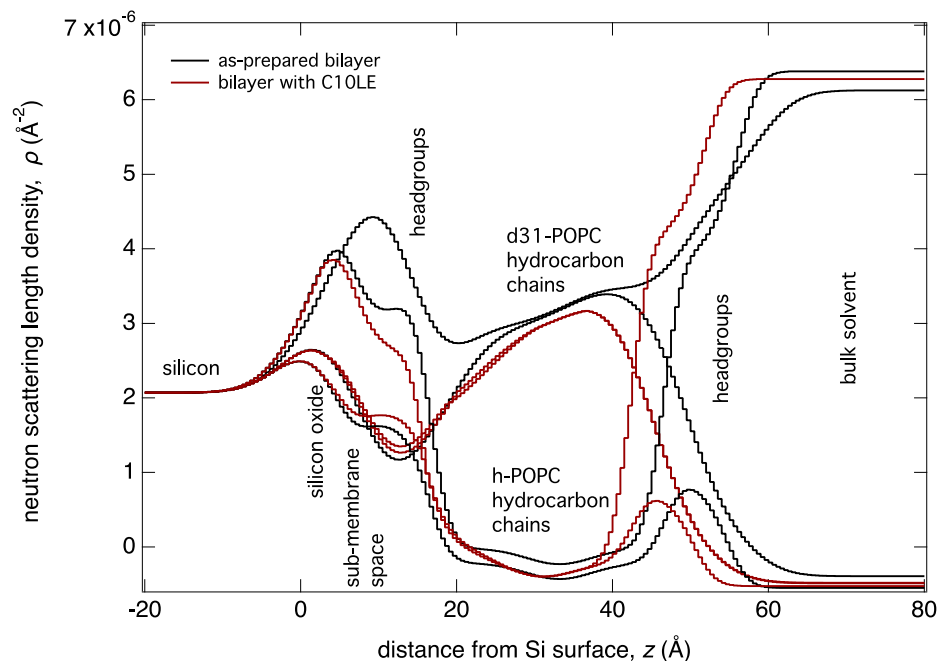

Figure S20: Best-fit nSLD profiles for the measurements of the as-prepared d<sub>31</sub>-POPC and h<sub>31</sub>-POPC lipid bilayers and after a final rinse with pure water.

## 2.4 Tetracycline

Table S4: Median fit parameter values and 68% confidence limits for the analysis of the tetracycline experiments.

|                                                                                                        | 5 $\mu$ M<br>tetracycline | 36 $\mu$ M<br>tetracycline | Rinse           |
|--------------------------------------------------------------------------------------------------------|---------------------------|----------------------------|-----------------|
| <b>Substrate</b>                                                                                       |                           |                            |                 |
| Thickness silicon oxide / $\text{\AA}$                                                                 | 6.9 $\pm$ 0.7             | 6.7 $\pm$ 0.6              | 6.7 $\pm$ 0.7   |
| Substrate roughness, standard deviation $\sigma$ / $\text{\AA}$                                        | 5.1 $\pm$ 0.4             | 5.2 $\pm$ 0.4              | 4.9 $\pm$ 0.5   |
| <b>Bilayer</b>                                                                                         |                           |                            |                 |
| Thickness sub-membrane space / $\text{\AA}$                                                            | 1.6 $\pm$ 0.6             | 2.1 $\pm$ 0.6              | 1.9 $\pm$ 0.6   |
| Hydrocarbon thickness inner lipid leaflet neat bilayer                                                 | 14.6 $\pm$ 0.6            | 14.6 $\pm$ 0.6             | 15.0 $\pm$ 0.6  |
| Hydrocarbon thickness outer lipid leaflet neat bilayer                                                 | 15.6 $\pm$ 0.5            | 15.7 $\pm$ 0.4             | 15.7 $\pm$ 0.4  |
| Thickness change per leaflet after incubation                                                          | -0.1 $\pm$ 0.1            | 0.0 $\pm$ 0.1              | 0.0 $\pm$ 0.1   |
| Bilayer completeness neat bilayer                                                                      | 1.00 $\pm$ 0.01           | 1.00 $\pm$ 0.01            | 1.00 $\pm$ 0.01 |
| Bilayer completeness after adding avobenzone                                                           | 1.00 $\pm$ 0.01           | 1.00 $\pm$ 0.01            | 1.00 $\pm$ 0.01 |
| <b>Tetracycline</b>                                                                                    |                           |                            |                 |
| tetracycline amount associated with bilayer (volume surface density) / ( $\text{\AA}^3/\text{\AA}^2$ ) | 1.0 $\pm$ 0.5             | 0.6 $\pm$ 0.4              | 1.3 $\pm$ 0.5   |

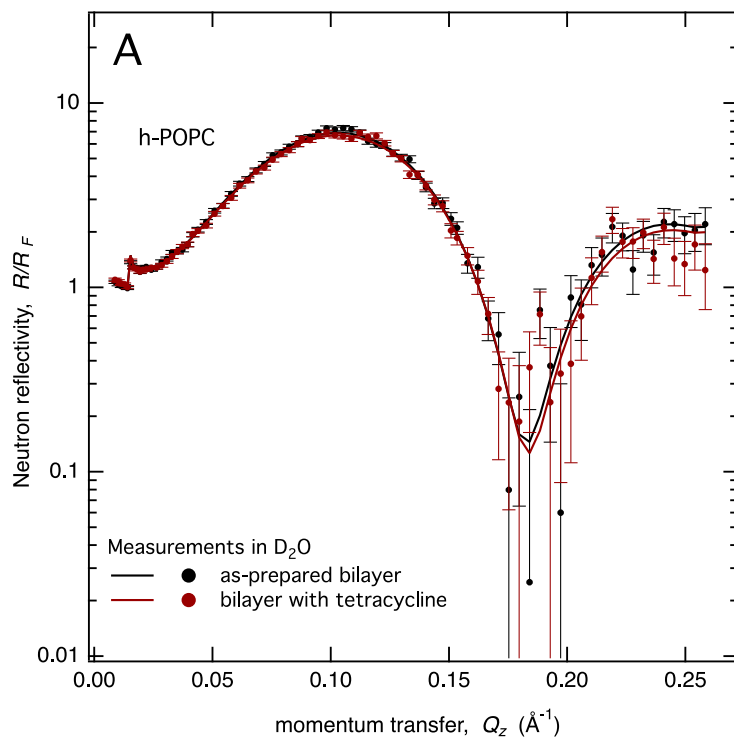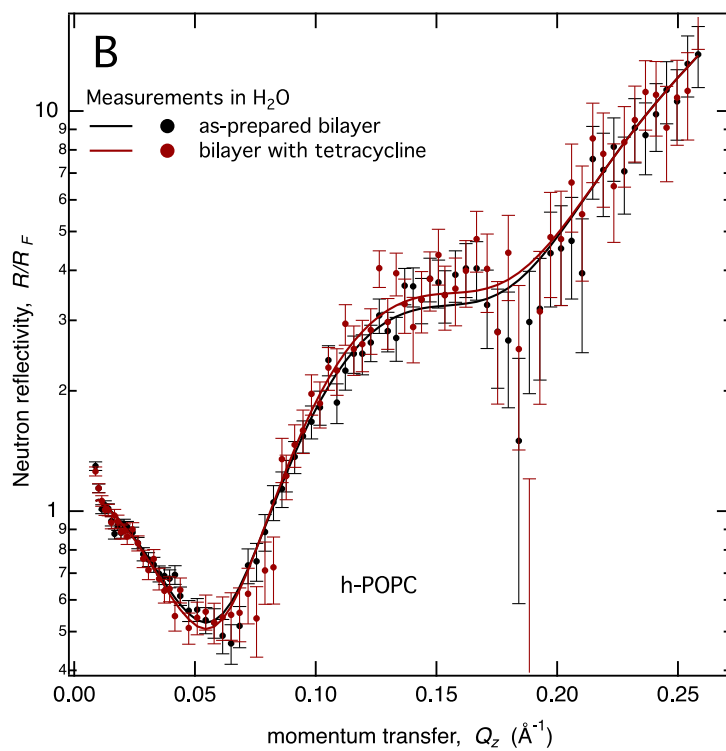

Figure S21: Fresnel normalized neutron reflectivity for the measurements of the as-prepared lipid bilayer and after adding of 5  $\mu\text{M}$  tetracycline.

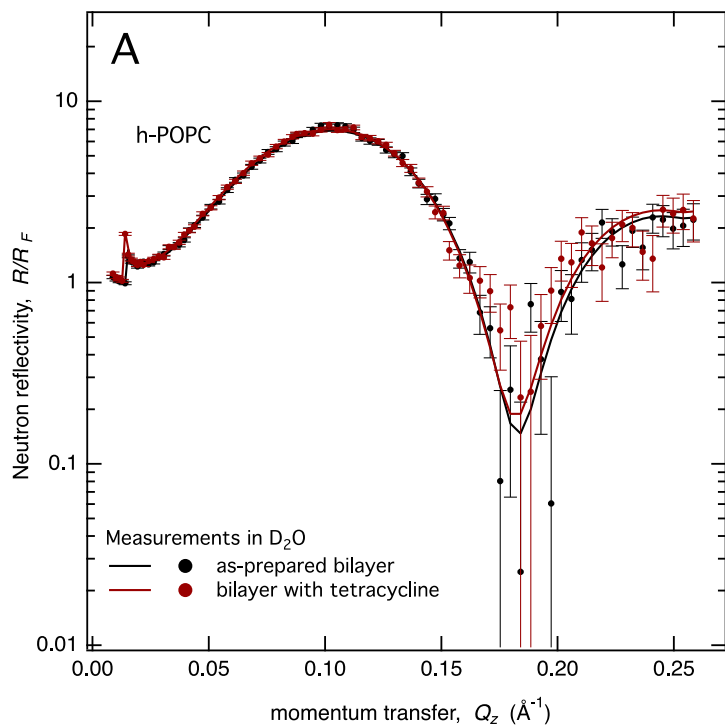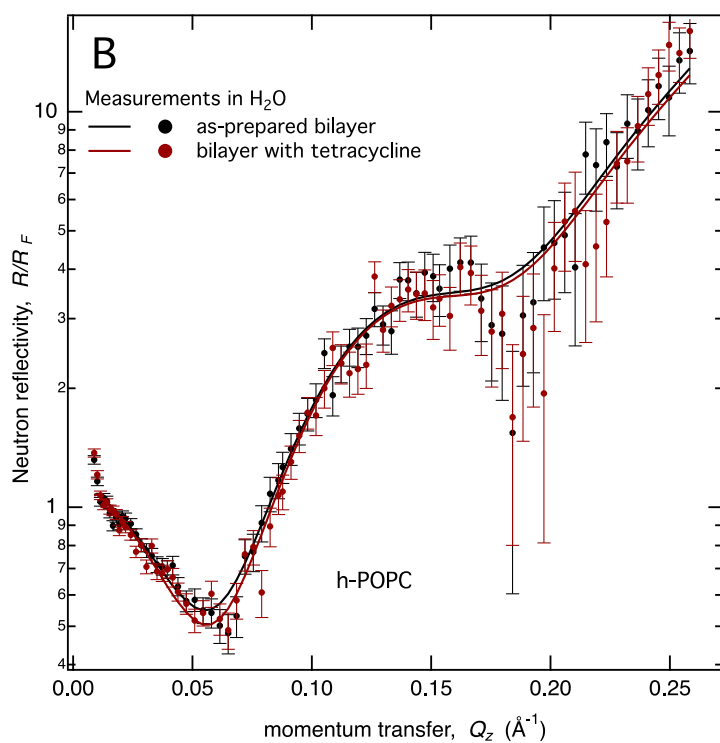

Figure S22: Fresnel normalized neutron reflectivity for the measurements of the as-prepared lipid bilayer and after adding of 36  $\mu\text{M}$  tetracycline.

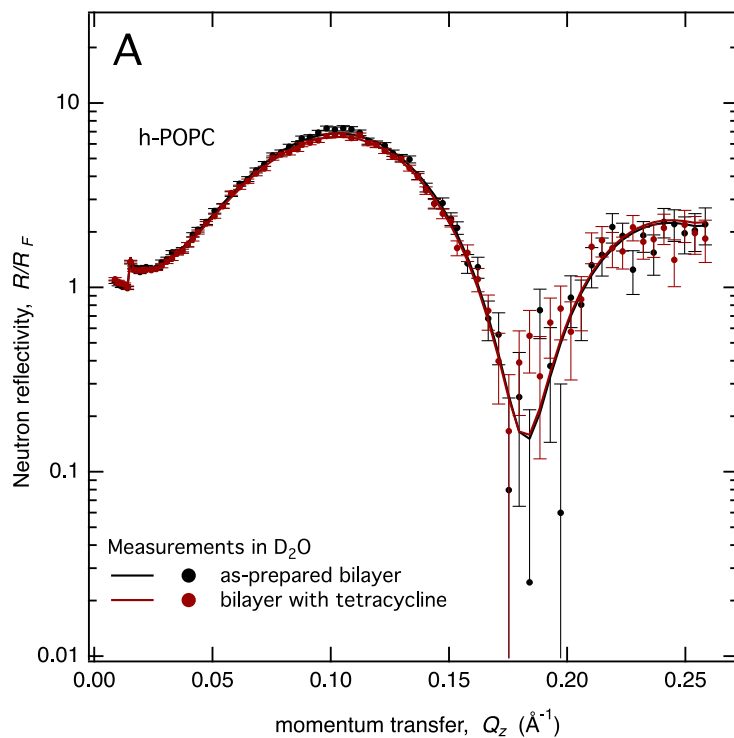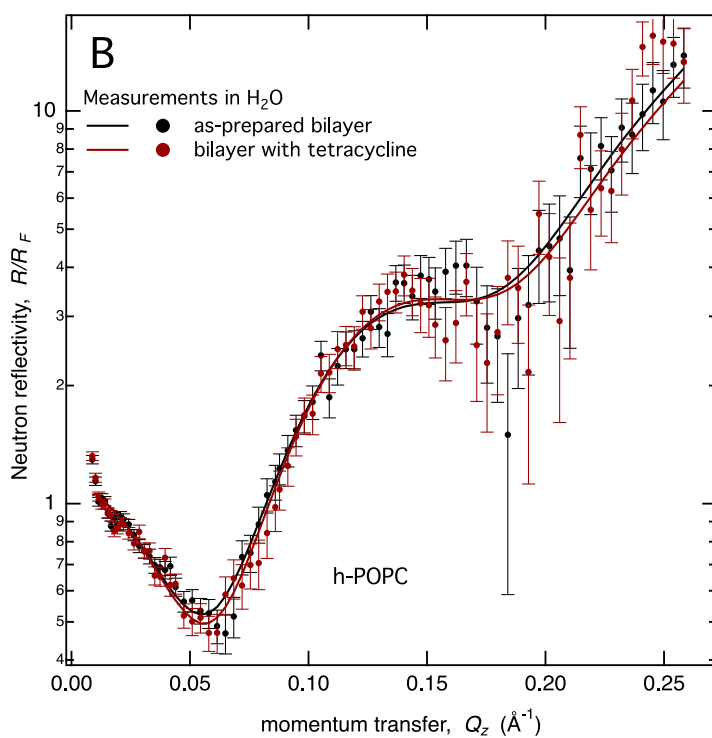

Figure S23: Fresnel normalized neutron reflectivity for the measurements of the as-prepared lipid bilayer and after a final rinse with pure water.

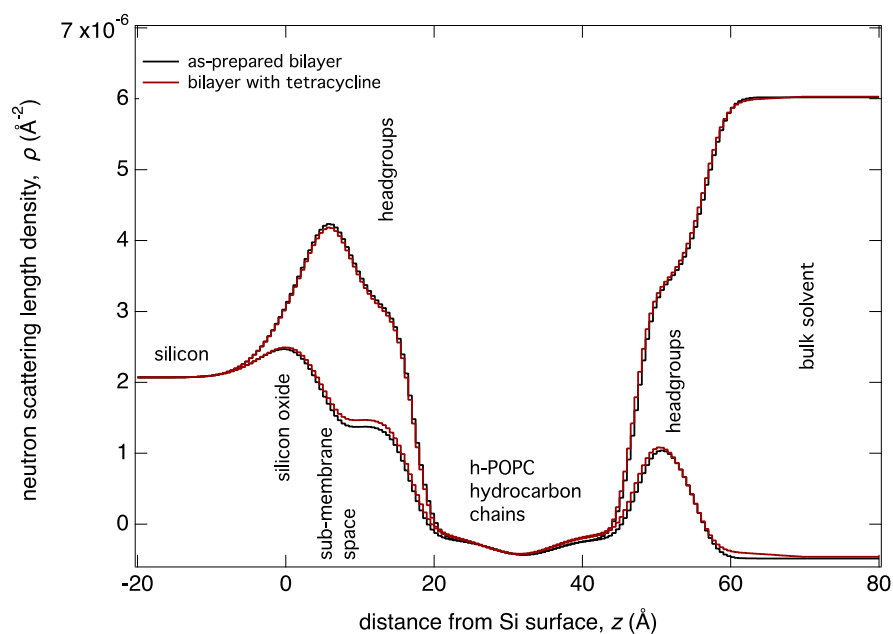

Figure S24: Best-fit nSLD profiles for the measurements of the as-prepared lipid bilayer and after adding 5  $\mu\text{M}$  tetracycline.

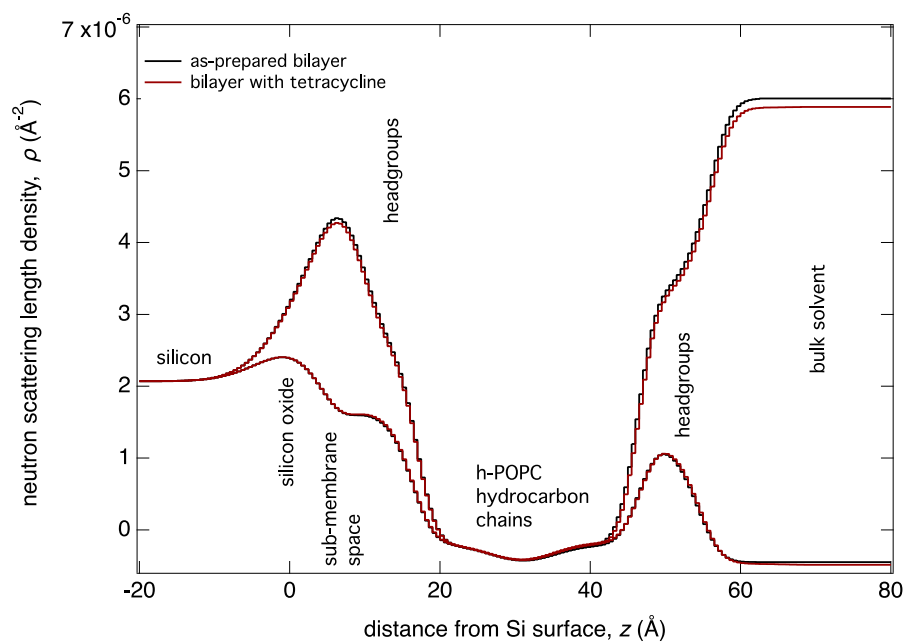

Figure S25: Best-fit nSLD profiles for the measurements of the as-prepared lipid bilayer and after adding 36  $\mu\text{M}$  tetracycline.

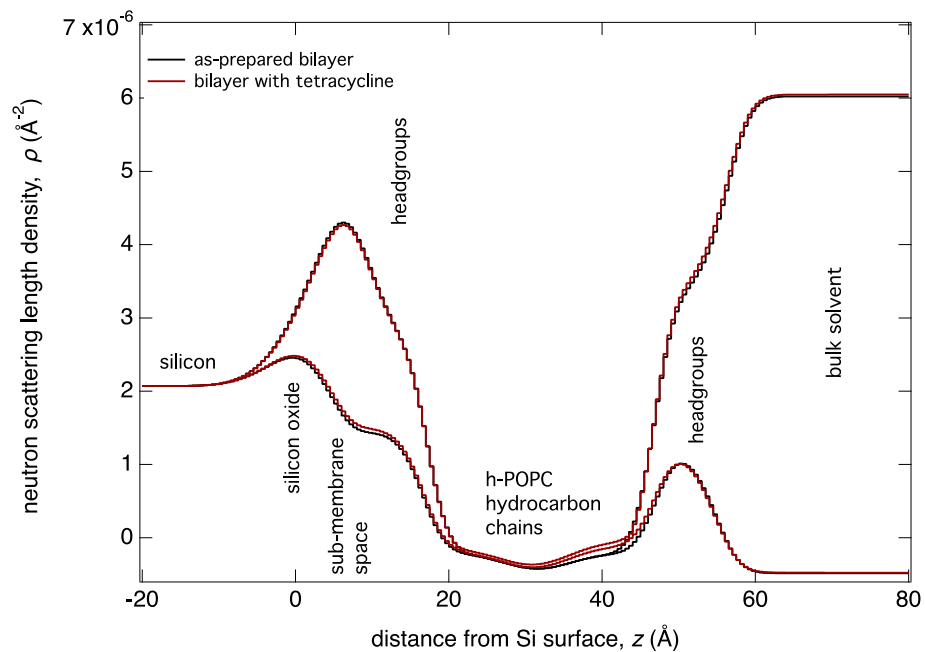

Figure S26: Best-fit nSLD profiles for the measurements of the as-prepared lipid bilayer and after adding 36  $\mu\text{M}$  tetracycline.
